# Supplementary material for: The Effects of CoCl2 on HIF-1α Protein under Experimental Conditions of Autoprogressive Hypoxia Using Mouse Models
Source: MDPI journal article supplement (doi:10.3390/ijms150610999), 2014-06-18

## Supplementary Information

**Figure S1.** Expression of HIF-1 $\alpha$  and  $\beta$ -actin at different time point after CoCl<sub>2</sub> treatment.

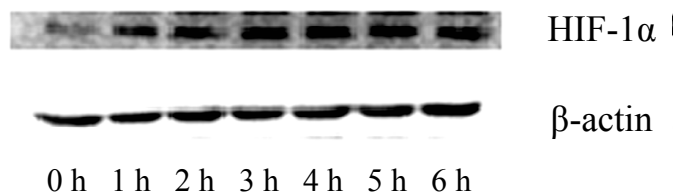

**Figure S2.** Ratio of HIF-1 $\alpha$  protein to  $\beta$ -actin protein at different time point.

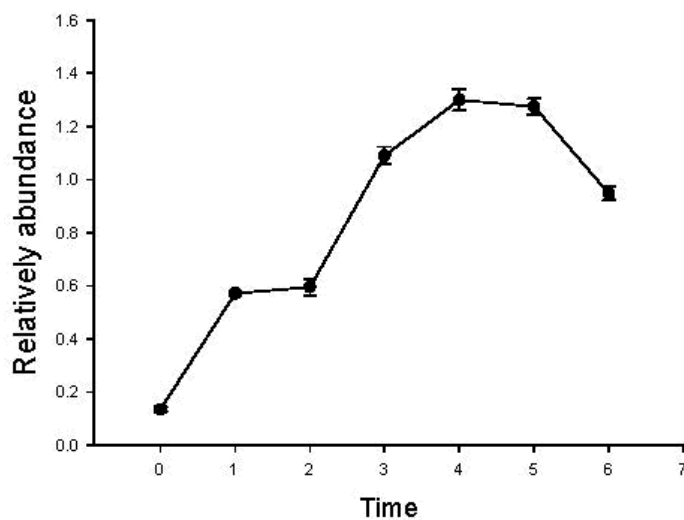

Supplement: s1 [file s1]
